# Supplementary material for: Life course socioeconomic position and the risk of cardiovascular events and all-cause mortality in a Norwegian twin study
Source: Research Square preprint supplement (doi:10.21203/rs.3.rs-4993031/v1), 2025-08-27
Supplement: Supplementary file 1 [file 3bca9826a5e99580fb6760e1.docx]

**Supplementary figure 1.** Tetrachoric correlation plot of SEP indicators as binary variables


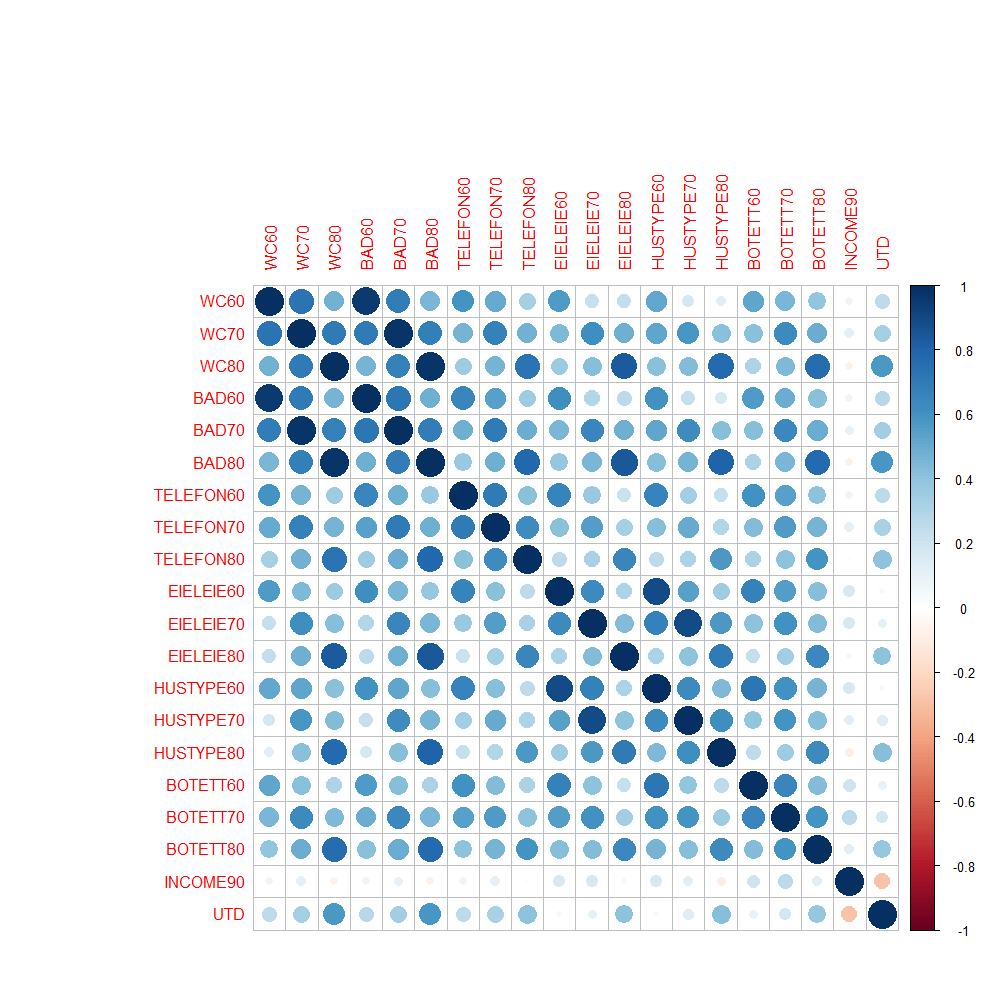


**Supplementary figure 2.** Figures for Item Response Theory modeling of SEP. Boundary Characteristic curves for indicators of SEP continuum.

Questionnaire 1-3

|  | |  |  | |
| --- | --- | --- | --- | --- |
|  |  | | |  |
| Did you have bathroom or WC in 1960s?  Yes (WCBAD60 =1) | Did you have bathroom or WC in 1970s?  Yes (WCBAD70 =1) | | | Did you have bathroom or WC in 1980s?  Yes (WCBAD80=1) |

Questionnaire 4-6

|  | |  |  | |
| --- | --- | --- | --- | --- |
|  |  | | |  |
| Did you have a telephone in 1960s?  Yes (TELEFON60 =1) | Did you have a telephone in 1970s?  Yes (TELEFON70 =1) | | | Did you have a telephone in 1980s?  Yes (TELEFON80 =1) |

Questionnaire 7-9

|  | |  |  | |
| --- | --- | --- | --- | --- |
|  |  | | |  |
| Did you own a property in 1960s?  Yes (EIELEIE 60 =1) | Did you own a property in 1970s?  Yes (EIELEIE 70 =1) | | | Did you own a property in 1980s?  Yes (EIELEIE 80 =1) |

Questionnaire 10-12

|  | |  |  | |
| --- | --- | --- | --- | --- |
|  |  | | |  |
| Was the ratio room per person ≥1 in 1960s?  Yes (BOTETT60=1) | Was the ratio room per person ≥1 in 1970s?  Yes (BOTETT70=1) | | | Was the ratio room per person ≥1 in 1980s?  Yes (BOTETT80=1) |

Questionnaire 13-15

|  | |  |  | |
| --- | --- | --- | --- | --- |
|  |  | | |  |
| Did you own a house in 1960s?  Yes (HUSTYPE60 =1) | Did you own a house in 1970s?  Yes (HUSTYPE70 =1) | | | Did you own a house in 1980s?  Yes (HUSTYPE80 =1) |

Questionnaire 16-17

|  |  |
| --- | --- |
|  |  |
| Was the income in the lowest group (lowest tertile)?  Yes (INCOME90=1) | Did you have an education level higher than high school?  Yes (UTD=1) |
|  |  |

| 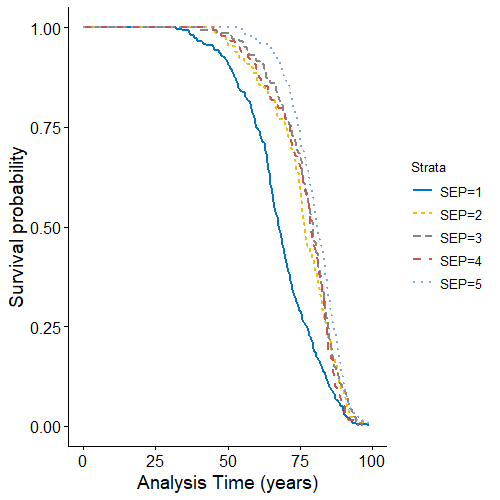  **A** | 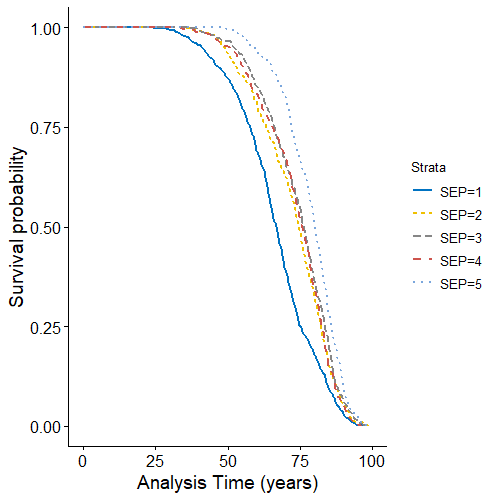  **B** |
| --- | --- |

**Supplementary figure 3.** Kaplan-Meier failure estimates for CVD events (A) and for all-cause mortality (B) according to five categories of life-course SEP in monozygotic twins

| 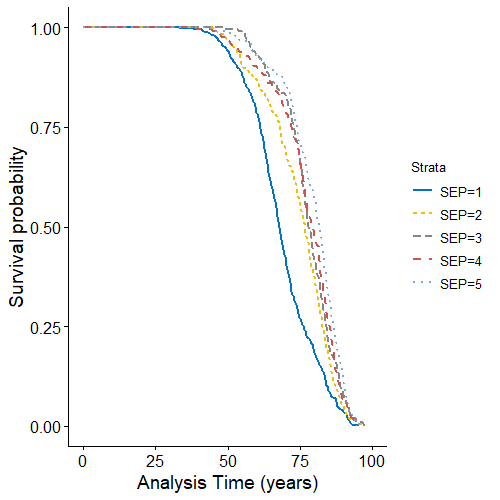  **A** | 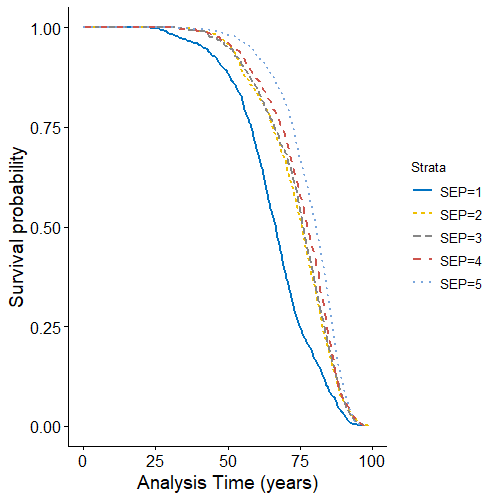  **B** |
| --- | --- |

**Supplementary figure 4.** Kaplan-Meier failure estimates for CVD events (A) and for all-cause mortality (B) according to five categories of life-course SEP in dizygotic twins

**Supplementary table 1.** Item response theory model parameters.

| **Description** | **Label** | **Discriminability** | **95% CI** | **Difficulty** | **95% CI** |
| --- | --- | --- | --- | --- | --- |
| Did you have bathroom or WC in 1960s? | WCBAD60 | 1.28 | (1.21 - 1.35) | −0.02 | (−0.05 - 0.01) |
| Did you have bathroom or WC in 1970s? | WCBAD70 | 1.75 | (1.66 - 1.85) | −0.92 | (−0.97 - −0.88) |
| Did you have bathroom or WC in 1980s? | WCBAD80 | 1.89 | (1.78 - 1.99) | −1.46 | (−1.52 - −1.40) |
| Did you have telephone in 1960s? | TELEFON60 | 1.39 | (1.31 - 1.47) | 0.40 | (0.37 - 0.44) |
| Did you have telephone in 1970s? | TELEFON70 | 1.99 | (1.87 - 2.11) | 0.05 | (0.02 - 0.07) |
| Did you have telephone in 1980s? | TELEFON80 | 1.35 | (1.27 - 1.43) | −0.50 | (−0.54 - −0.46) |
| Did you own a property in 1960s (ownership status)? | EIELEIE60 | 0.25 | (0.20 - 0.30) | −2.77 | (−3.34 - −2.20) |
| Did you own a flat in 1970s? | EIELEIE70 | 0.39 | (0.34 - 0.45) | −1.16 | (−1.34 - −0.97) |
| Did you own a flat in 1980s? | EIELEIE80 | 0.54 | (0.20 - 0.30) | −2.47 | (−2.74 - −2.19) |
| Did you own a house in 1960s (house type)? | HUSTYPE60 | −0.14 | (−0.21 - −0.08) | 11.25 | (6.27 - 16.23) |
| Did you own a house in 1970s? | HUSTYPE70 | 0.32 | (0.27 - 0.37) | −1.90 | (−2.22 - −1.57) |
| Did you own a house in 1980s? | HUSTYPE80 | 0.34 | (0.28 - 0.41) | −4.11 | (−4.87 - −3.36) |
| Was the ratio room per person ≥1 in 1960s? | BOTETT60 | 0.77 | (0.71 - 0.83) | 1.26 | (1.17 - 1.36) |
| Was the ratio room per person ≥1 in 1970s? | BOTETT70 | 0.79 | (0.73 - 0.84) | −0.17 | (−0.21 - −0.12) |
| Was the ratio room per person ≥1 in 1980s? | BOTETT80 | 0.68 | (0.61 - 0.75) | −2.15 | (−2.35 - −1.95) |
| Was the income in the lowest group (lowest tertile)? | INCOME90 | −0.23 | (−0.28 - −0.18) | −3.59 | (−4.35 - −2.83) |
| Did you have education level higher than high school? | UTD | 0.89 | (0.83 - 0.95) | −0.66 | (−0.72 - −0.61) |
